# Supplementary material
Source: PubMed Central journal article supplement (PMC6657285)
Supplement: cvy163_supplementary_figures.pdf [file cvy163_supplementary_figures.pdf]

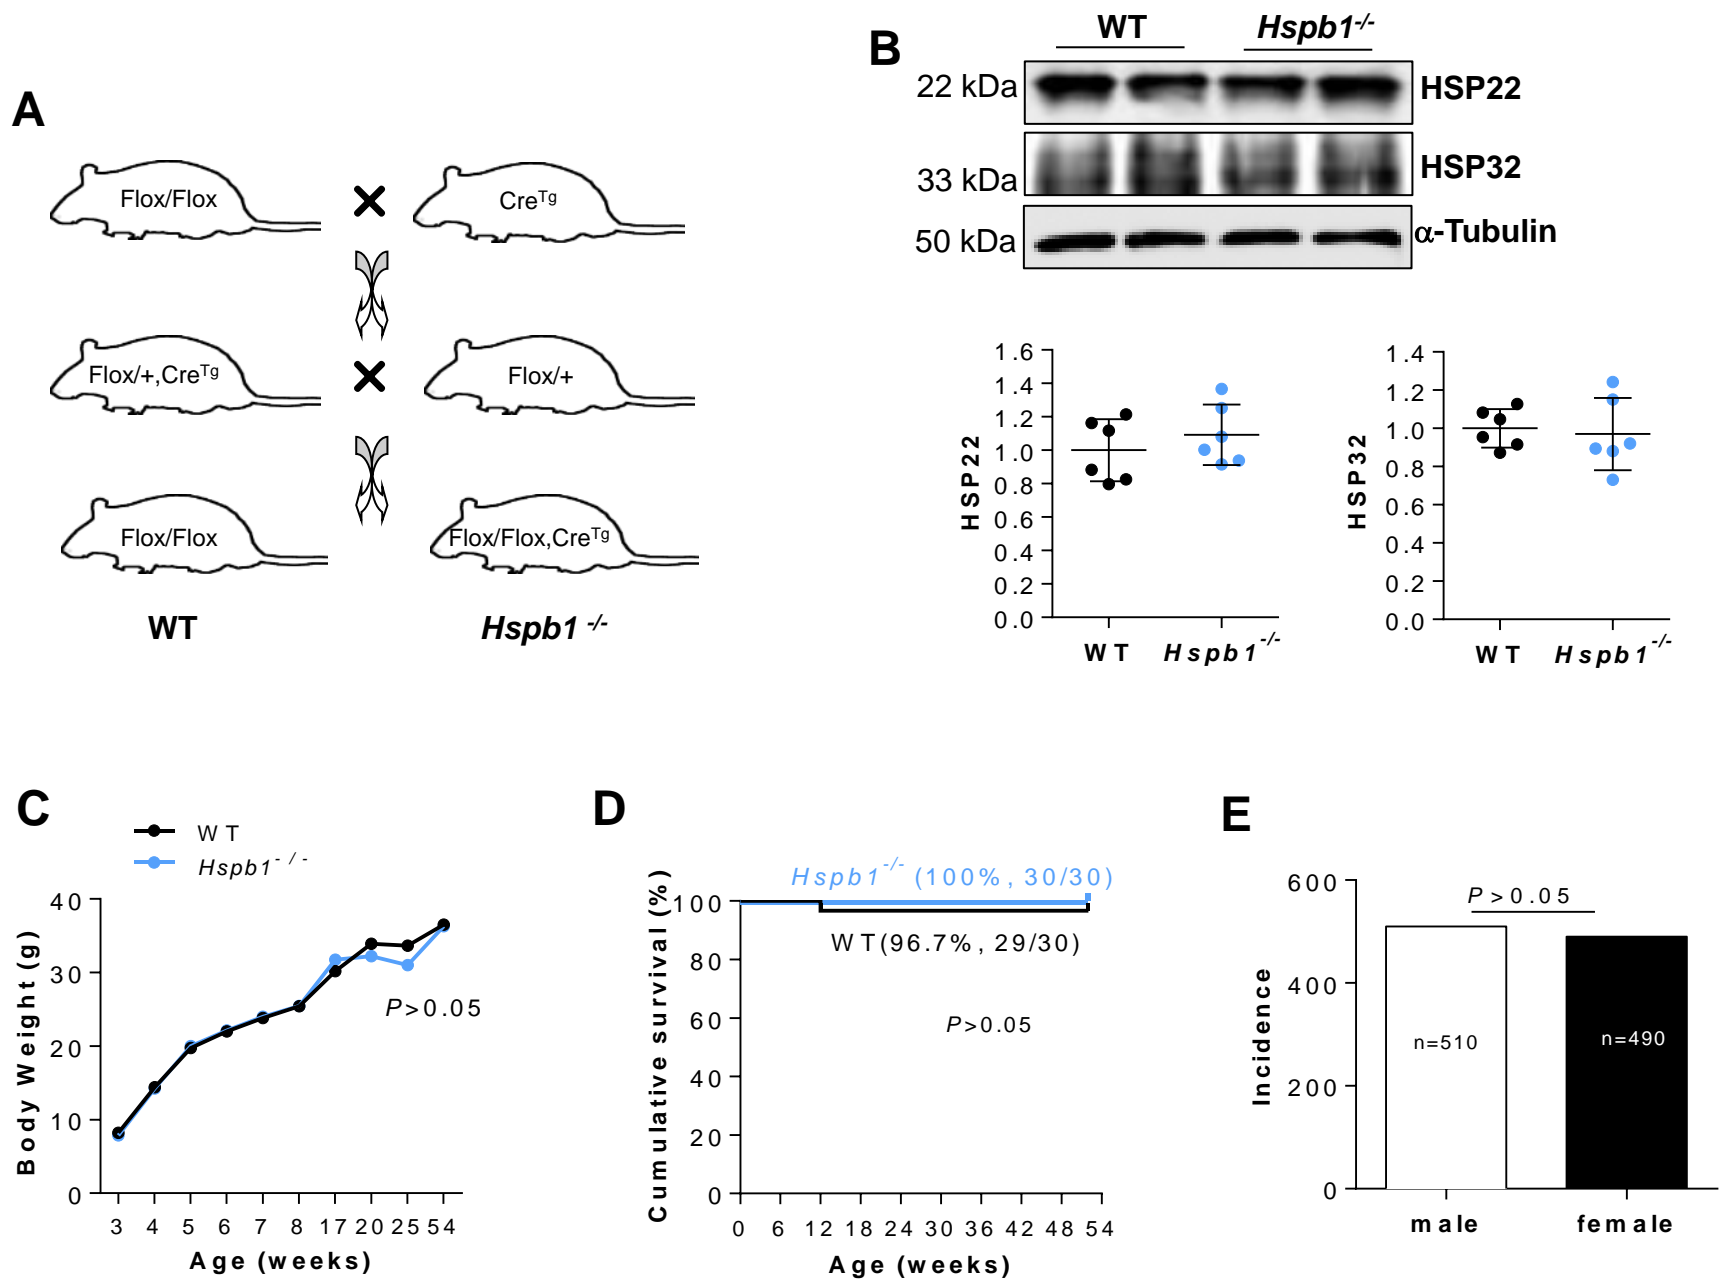

**Figure S1**

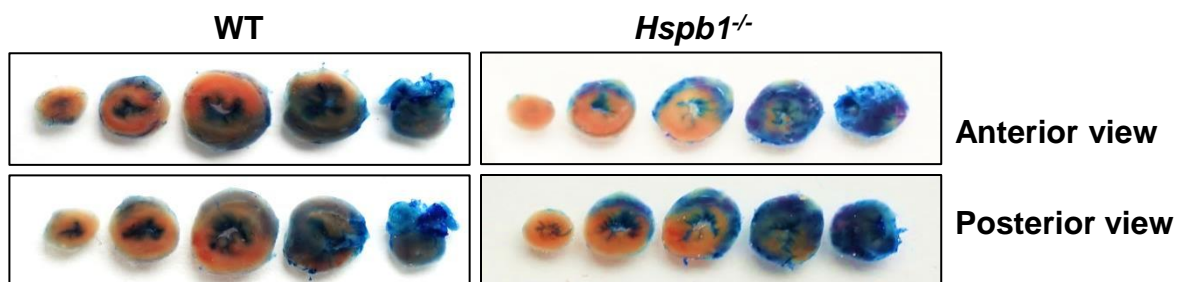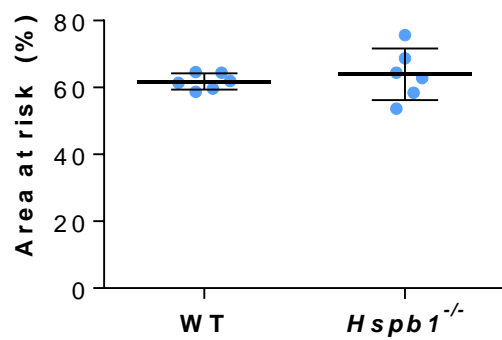

Figure S2

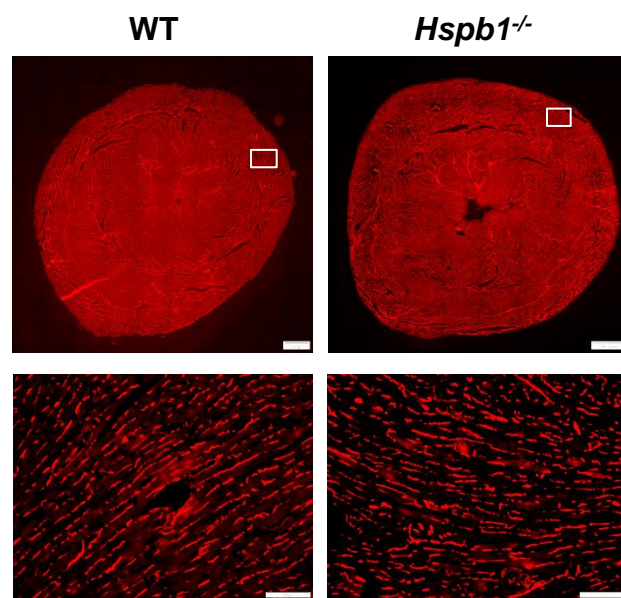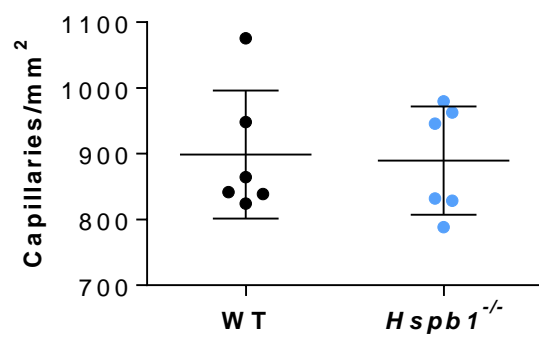

**Figure S3**

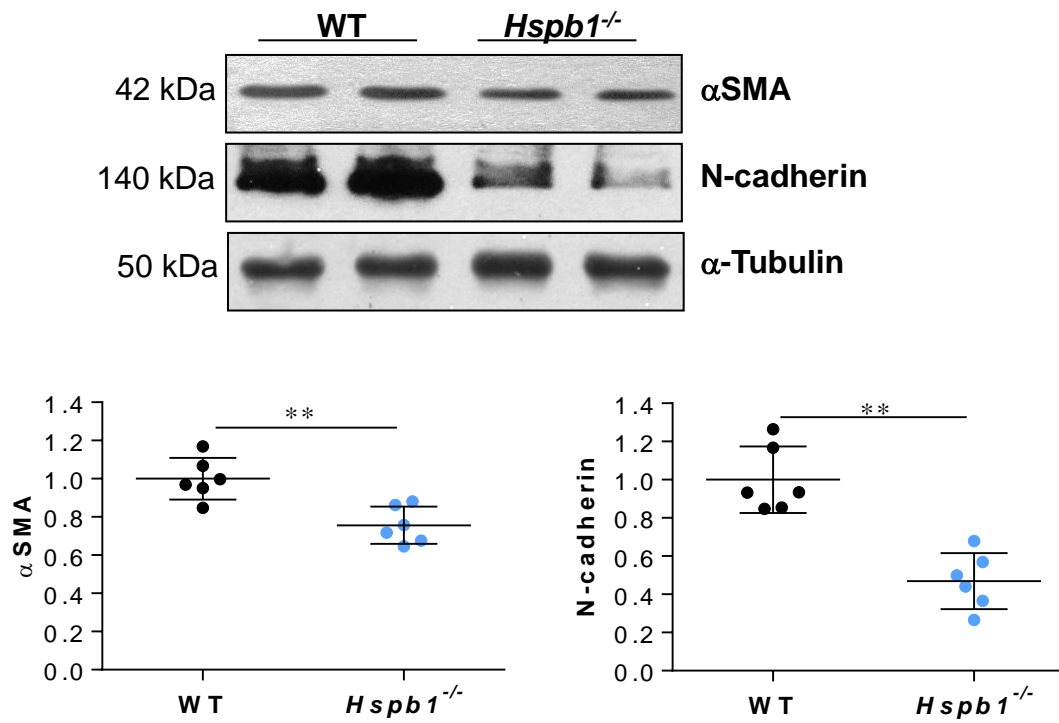

**Figure S4**

**A**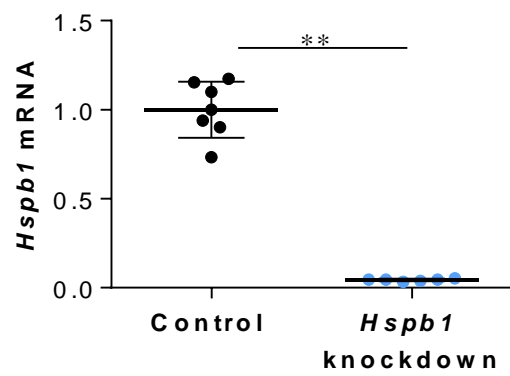**B**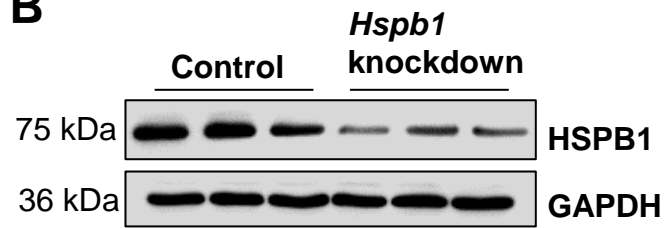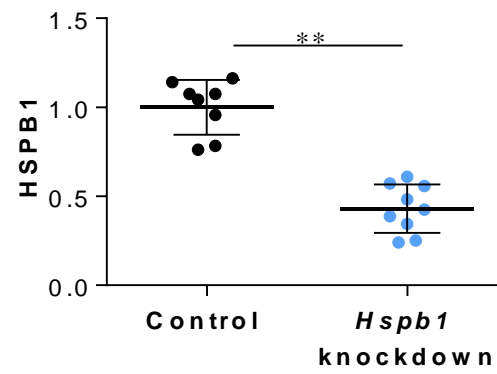**Figure S5**

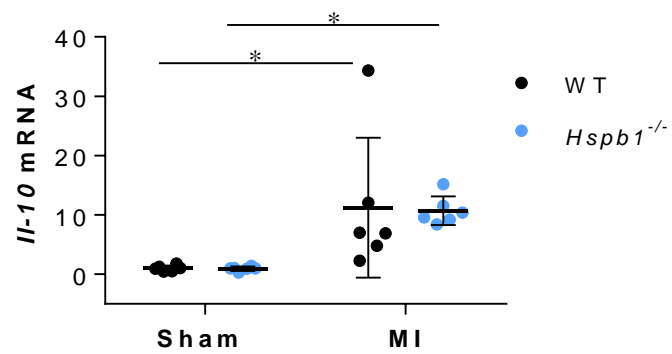

**Figure S6**

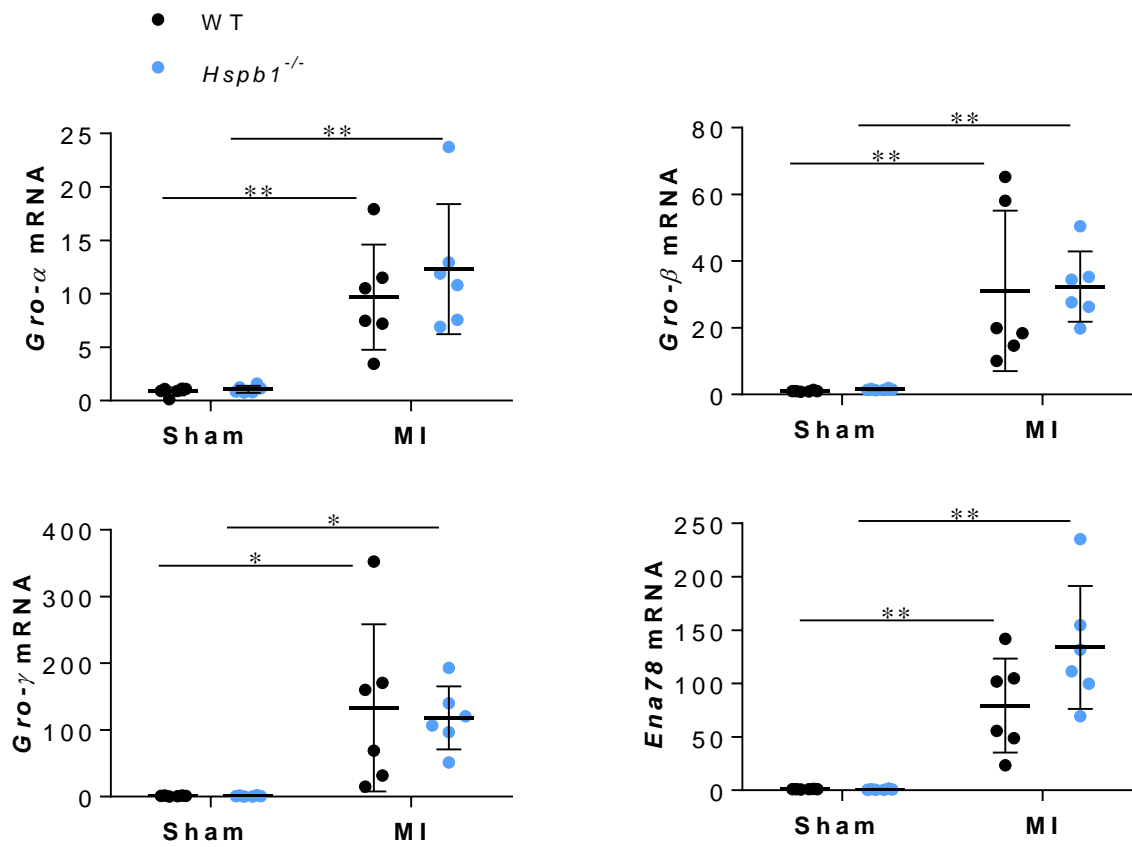

**Figure S7**

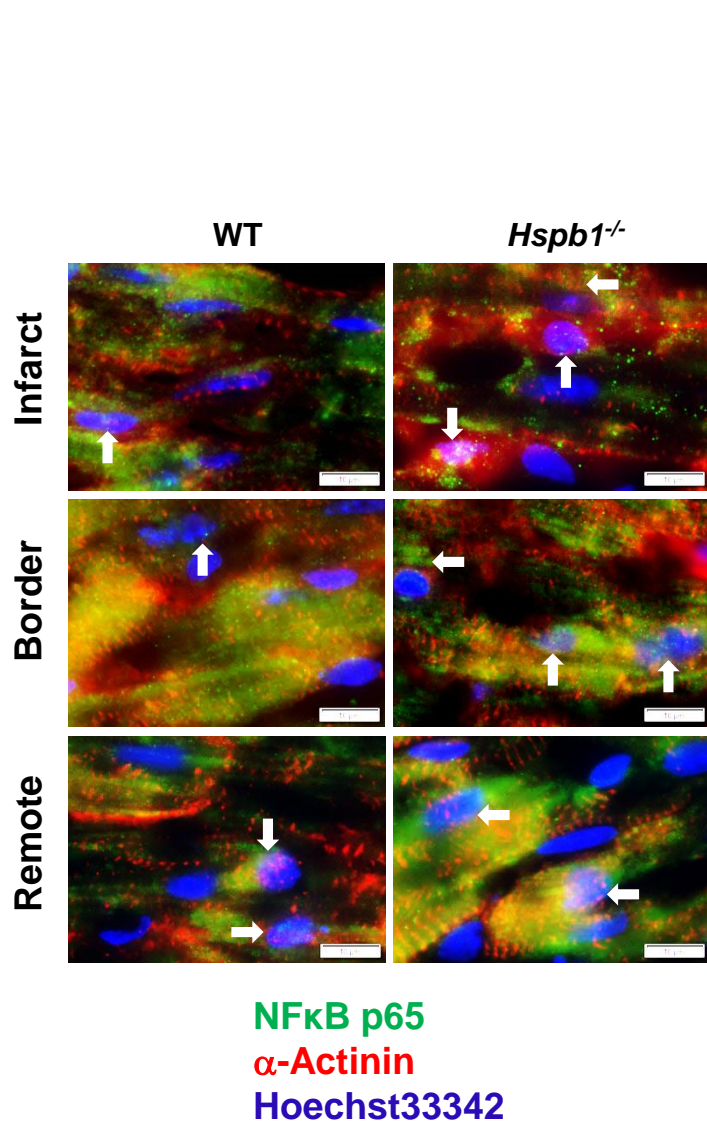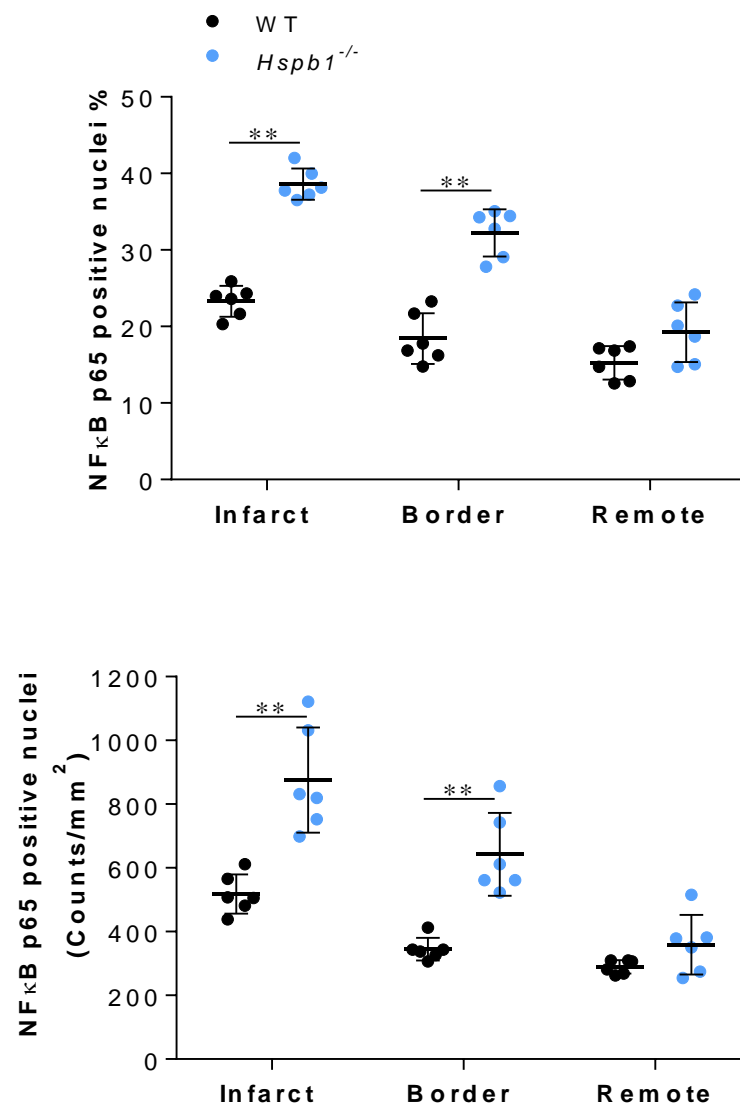

Figure S8



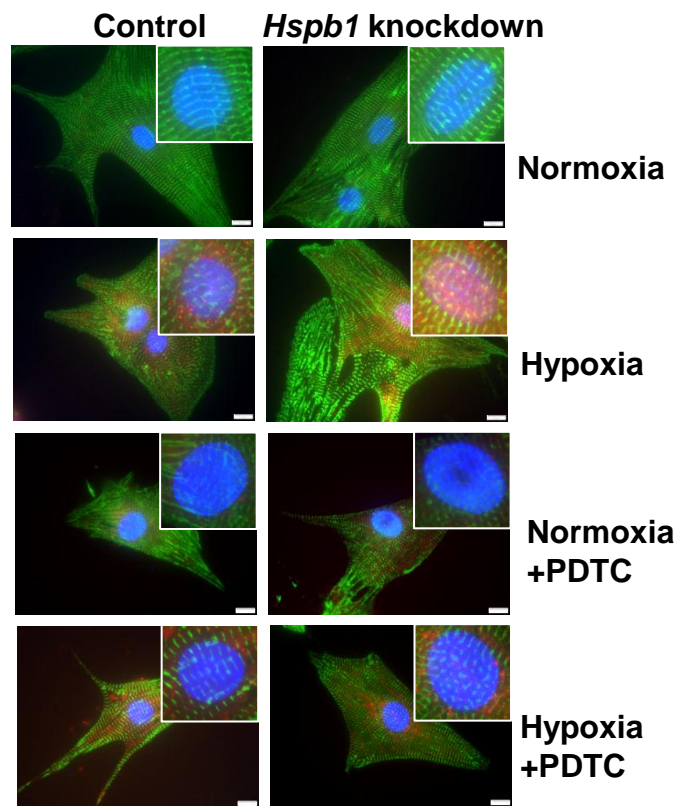

NFκB p65; α-Actinin; Hoechst33342

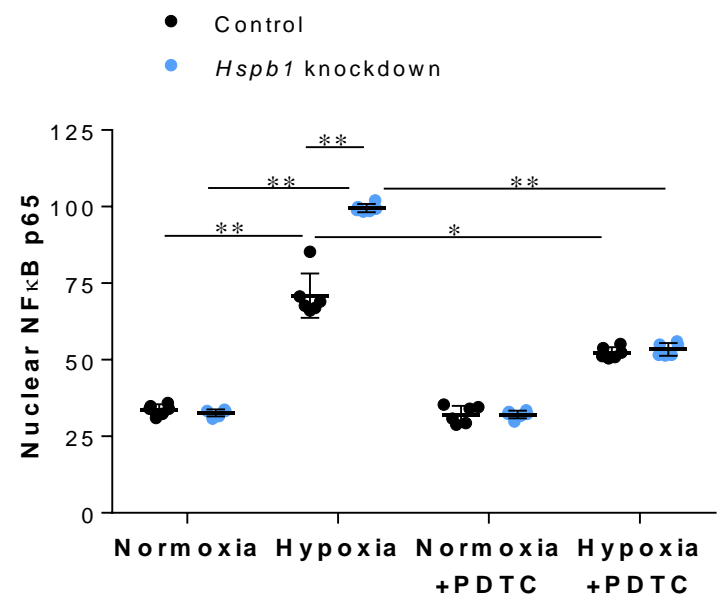

Figure S9

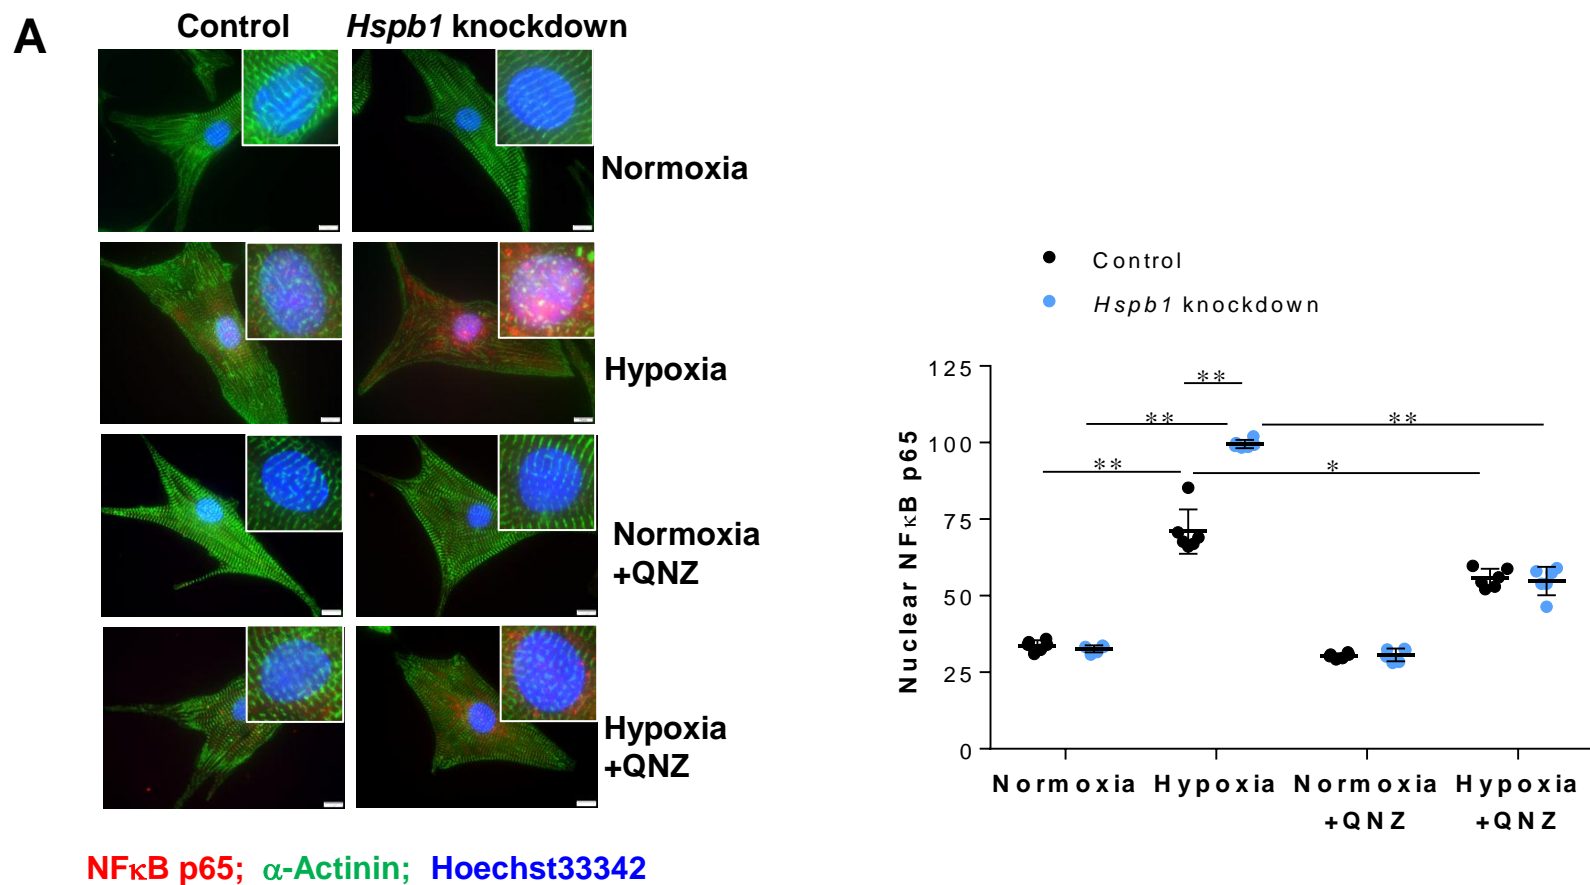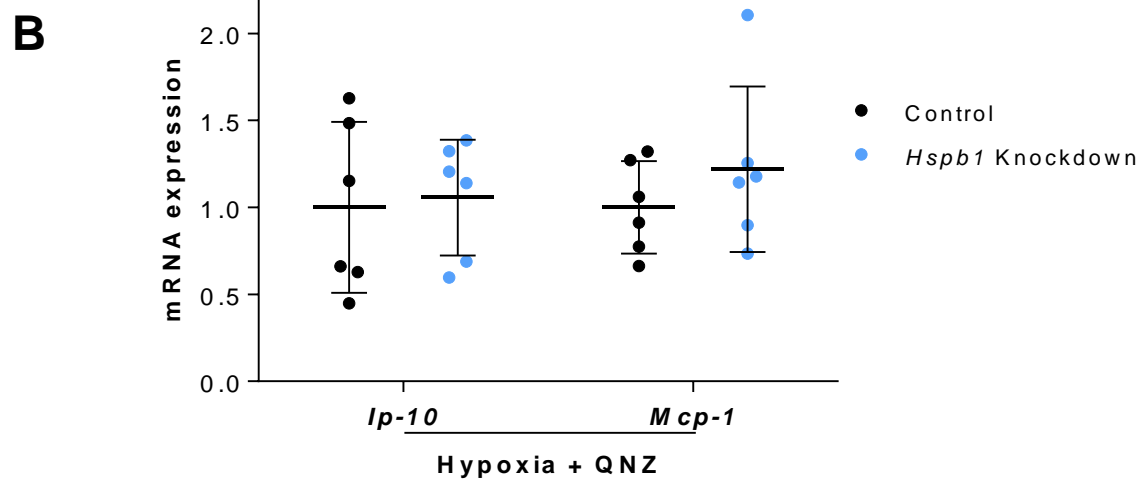

**Figure S10**

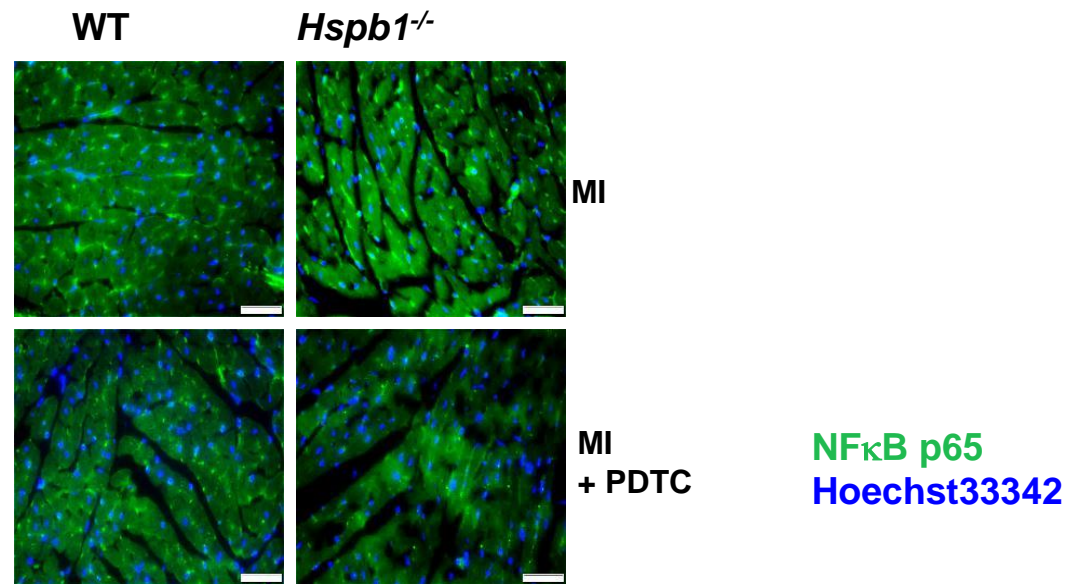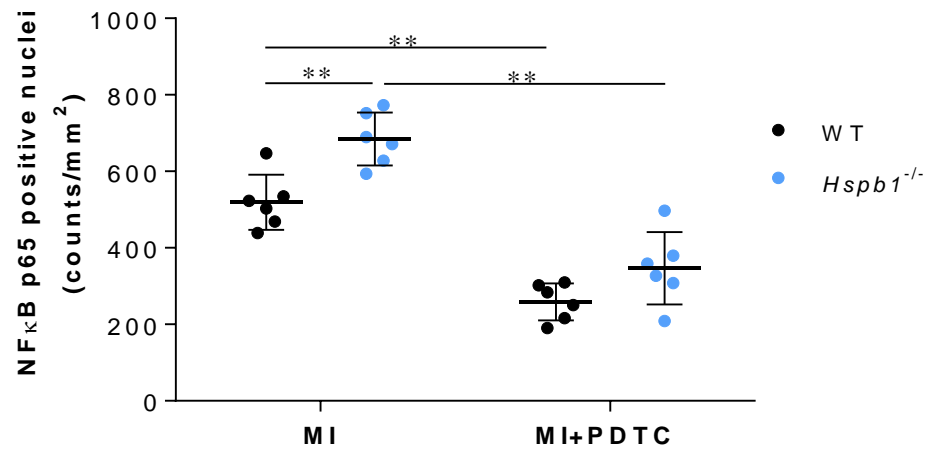

Figure S11

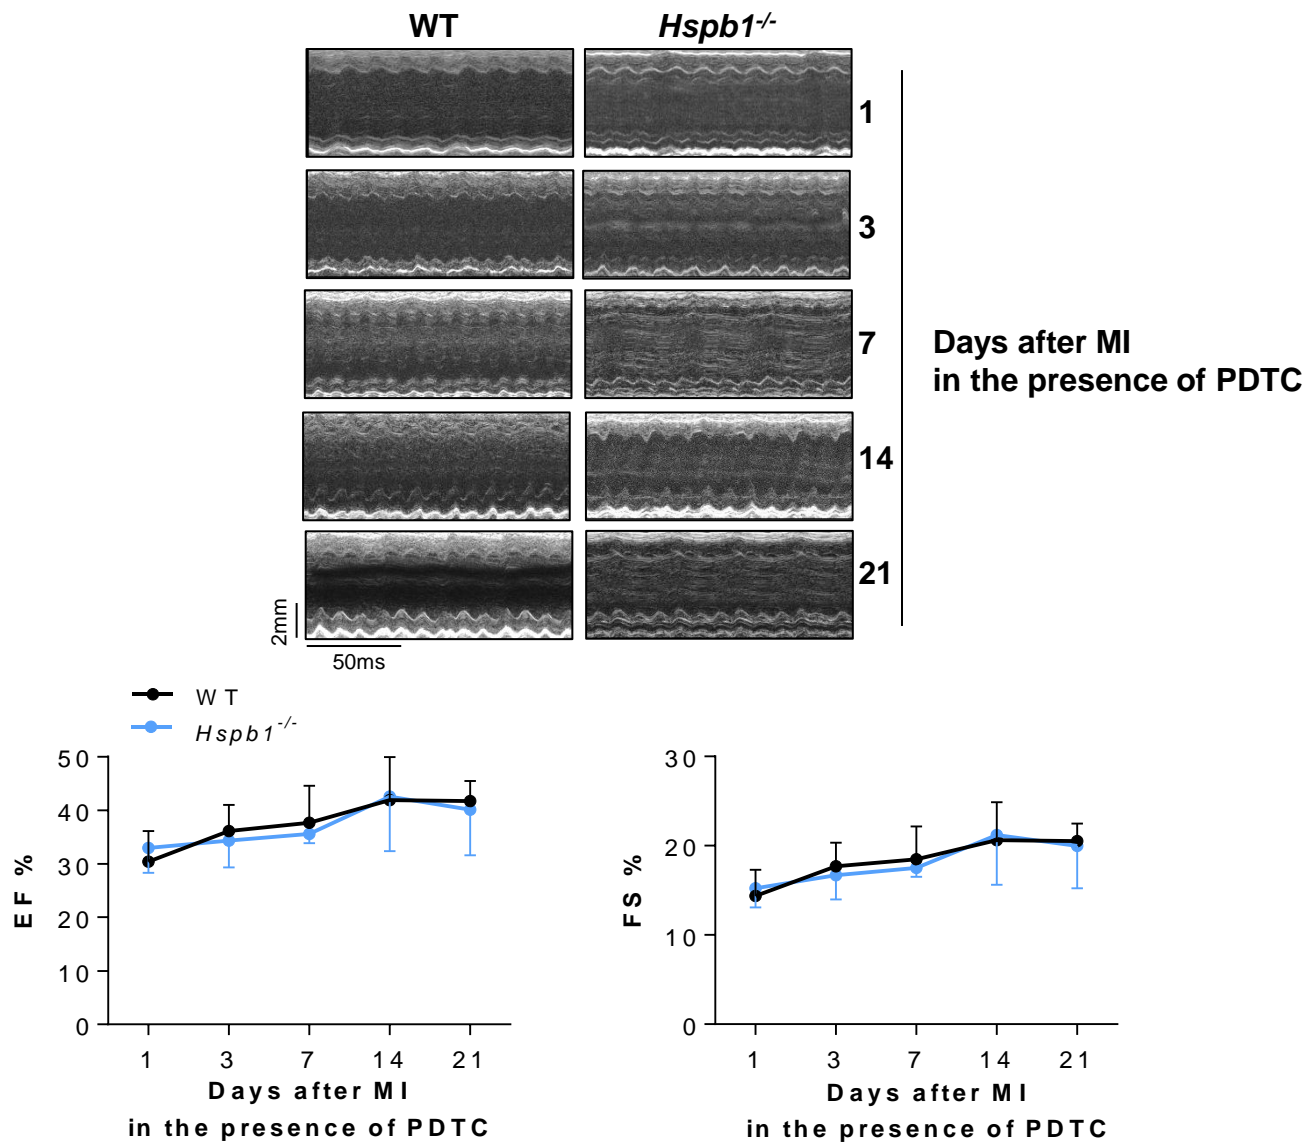

**Figure S12**

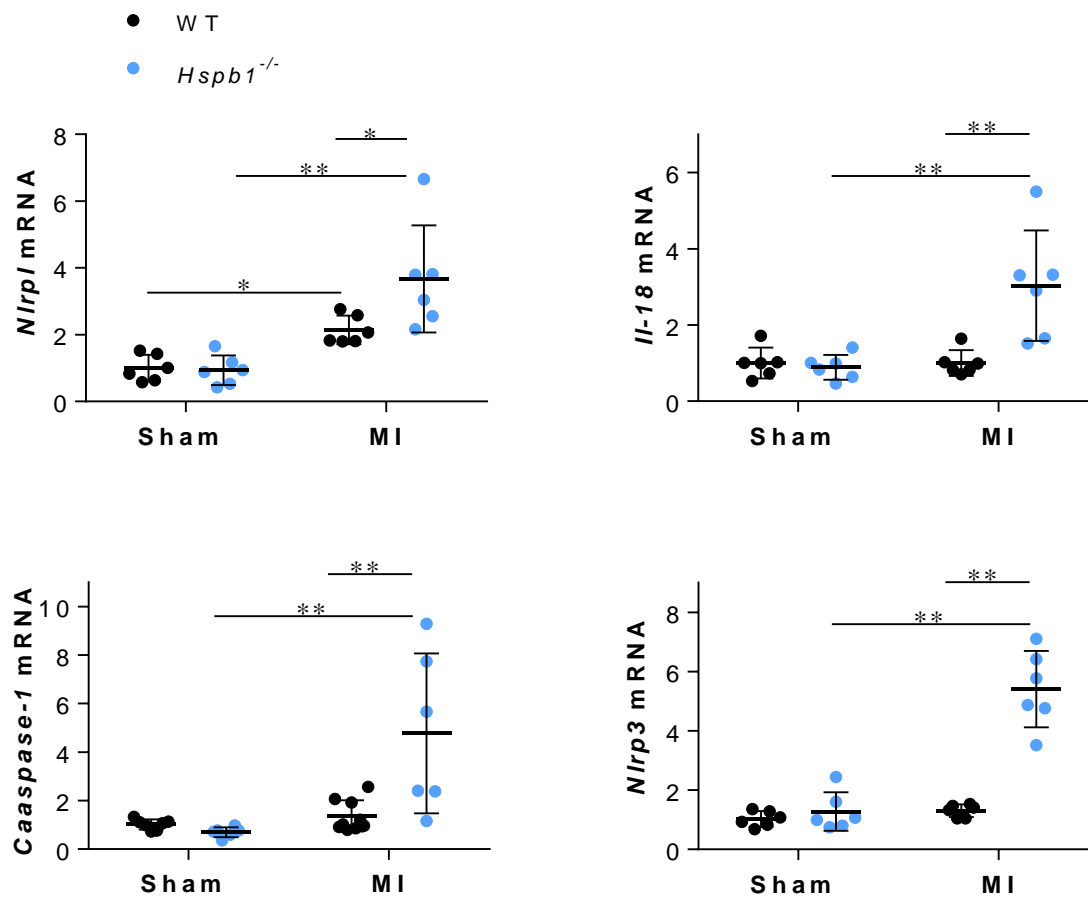

**Figure S13**

**A**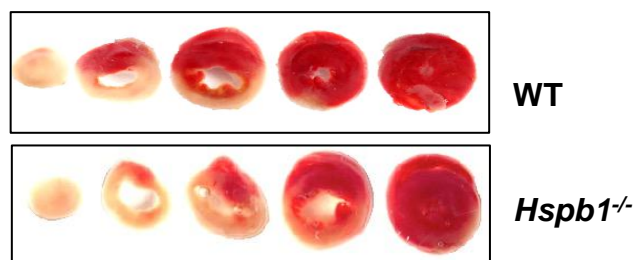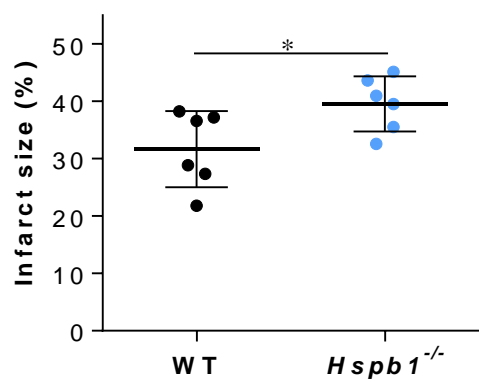**B**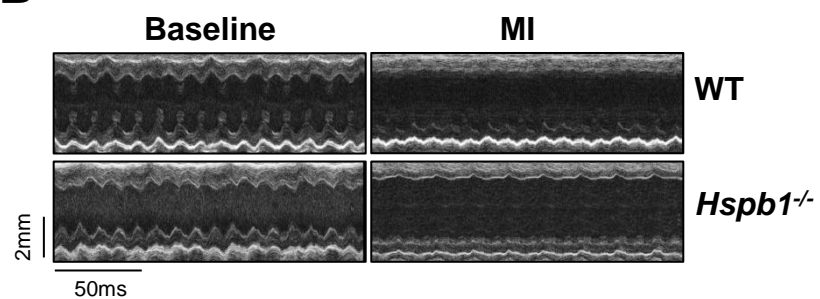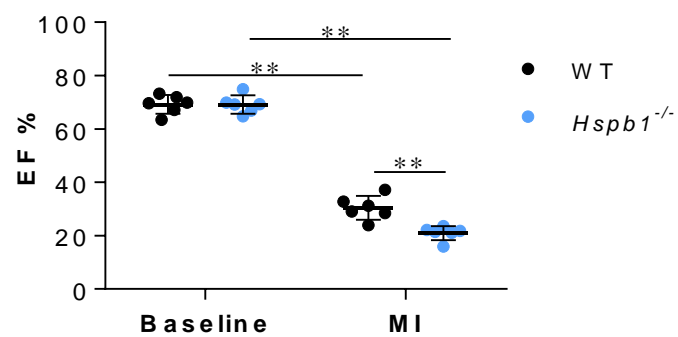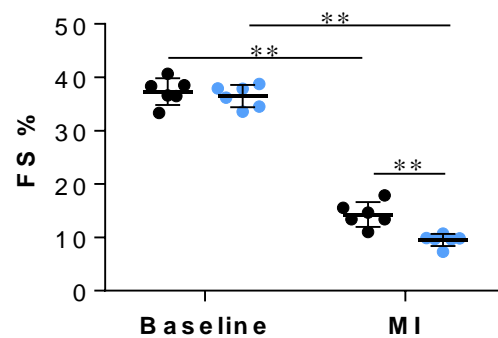**Figure S14**

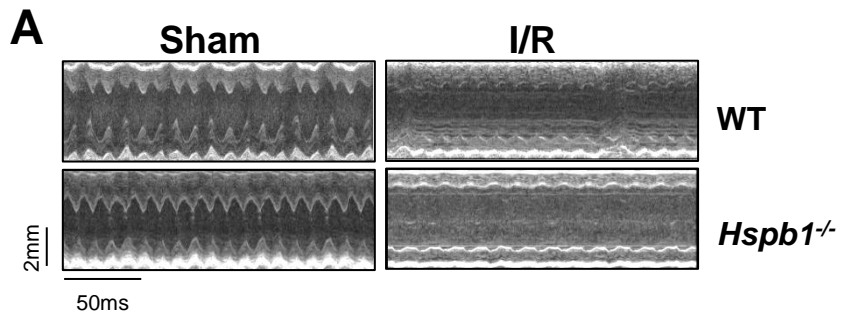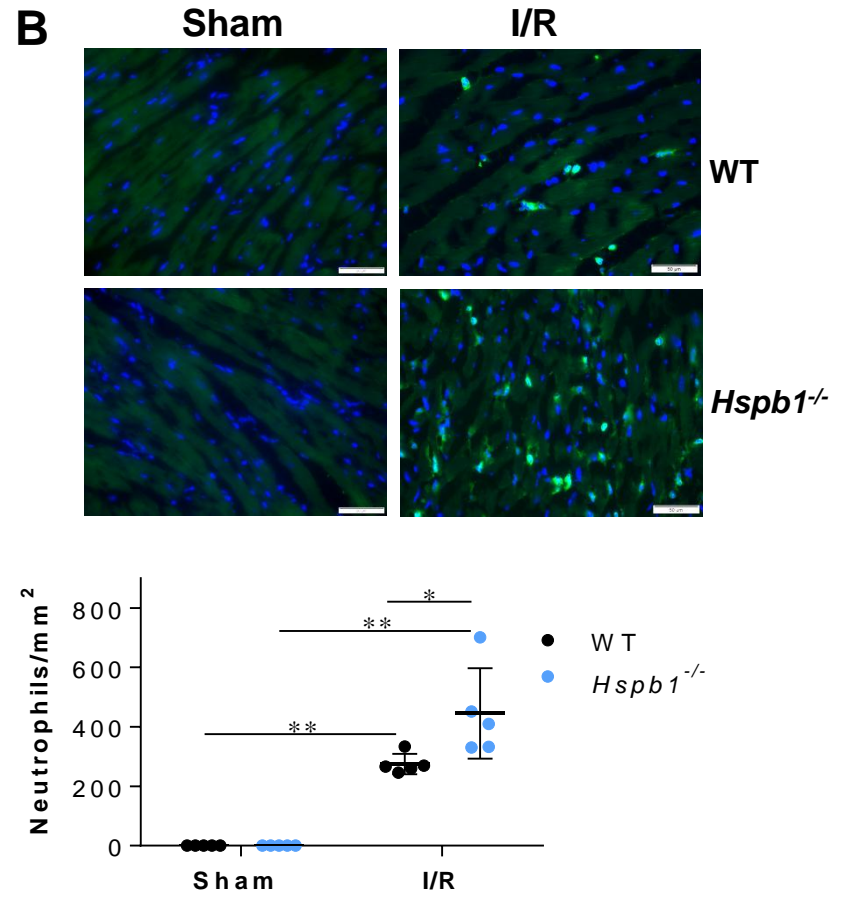

**Figure S15**
